# Supplementary material
Source: publisher figshare collection journal article supplement (https://gsajournals.figshare.com/articles/dataset/_/17096684)
Supplement: Supplementary file 1 [file 1]

## SUPPLEMENTAL MATERIAL

**Supplemental Video 1:** Time-lapse recording of a control NC 13 embryo expressing *RFP-PACT* (magenta) and *GFP-Cnn* (green). Playback speed is 6 frames per second. Approximately 5.5 minutes of developmental time is displayed.

<https://figshare.com/articles/media/Videos/17072552>

**Supplemental Video 2:** Time-lapse recording of a *cen* null NC 13 embryo expressing *RFP-PACT* (magenta) and *GFP-Cnn* (green). Playback speed is 6 frames per second. Approximately 5.5 minutes of developmental time is displayed.

<https://figshare.com/articles/media/Videos/17072552>
